# Supplementary material for: Identification of cis- and trans-acting elements regulating calretinin expression in mesothelioma cells
Source: PubMed Central journal article supplement (PMC5008284; doi:10.18632/oncotarget.7114), 2016-02-01
Supplement: oncotarget-07-21272-s001.pdf [file oncotarget-07-21272-s001.pdf]

## Identification of *cis*- and *trans*-acting elements regulating calretinin expression in mesothelioma cells

### Supplementary Materials

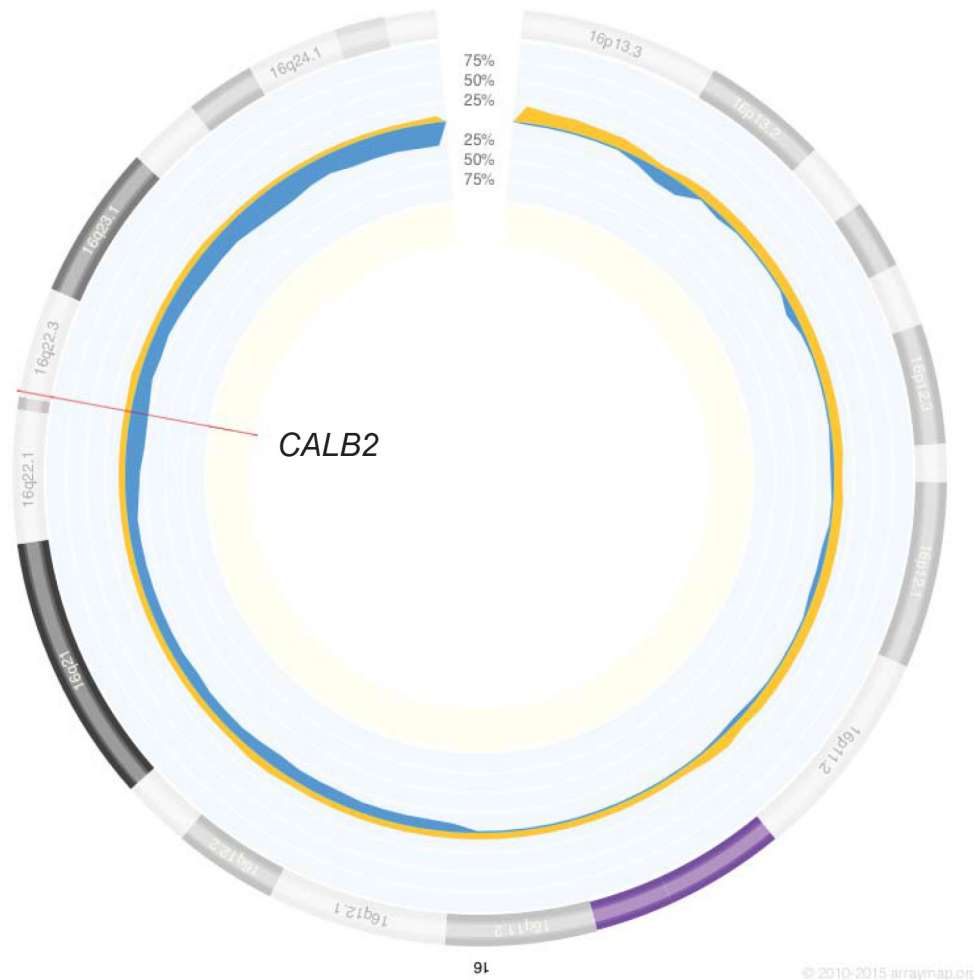

**Supplementary Figure S1: Genetic rearrangement profile of chromosome 16 analyzed on mesothelioma samples using arrayMap, a curated reference database and bioinformatics resource targeting copy number profiling data in human cancer, including mesothelioma.** The plot represents 49 mesothelioma tumor samples (1, 2), of which 60% are epithelioid, 20% biphasic and 20% sarcomatoid. Percentage values represent frequency of the copy number gains (yellow) and losses (blue) account for the mesothelioma whole data set. Locus of *CALB2* gene is affected by copy number loss in less than 25% of analyzed mesothelioma samples.

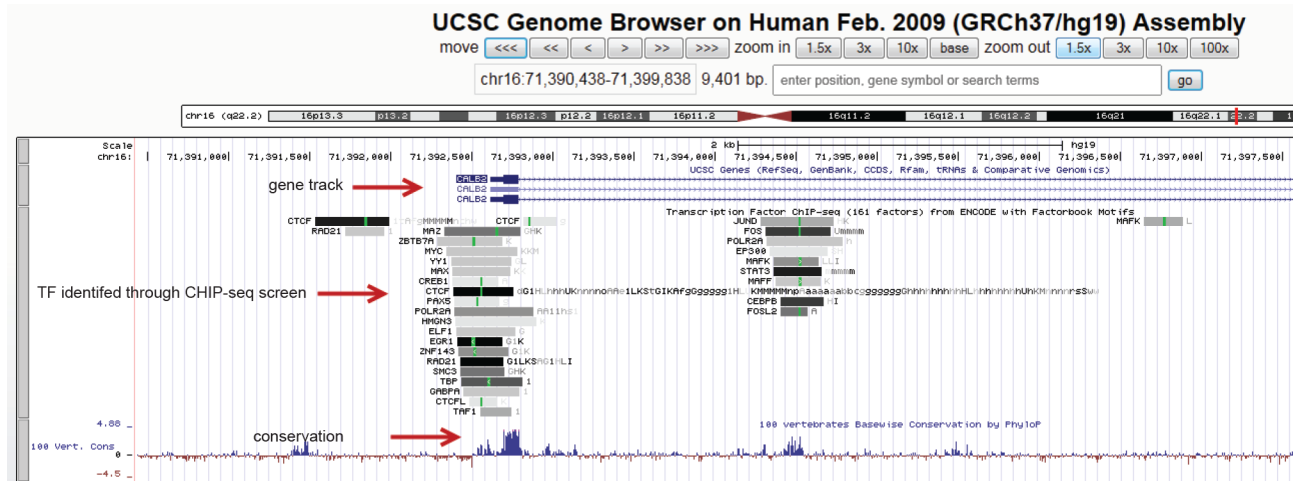

**Supplementary Figure S2: -1 kb of *CALB2* promoter occupied by various transcription factors identified through ChIP-seq screen. UCSC genome browser shows the presence of general TF, Polymerase II, suggesting location of *CALB2* promoter.**

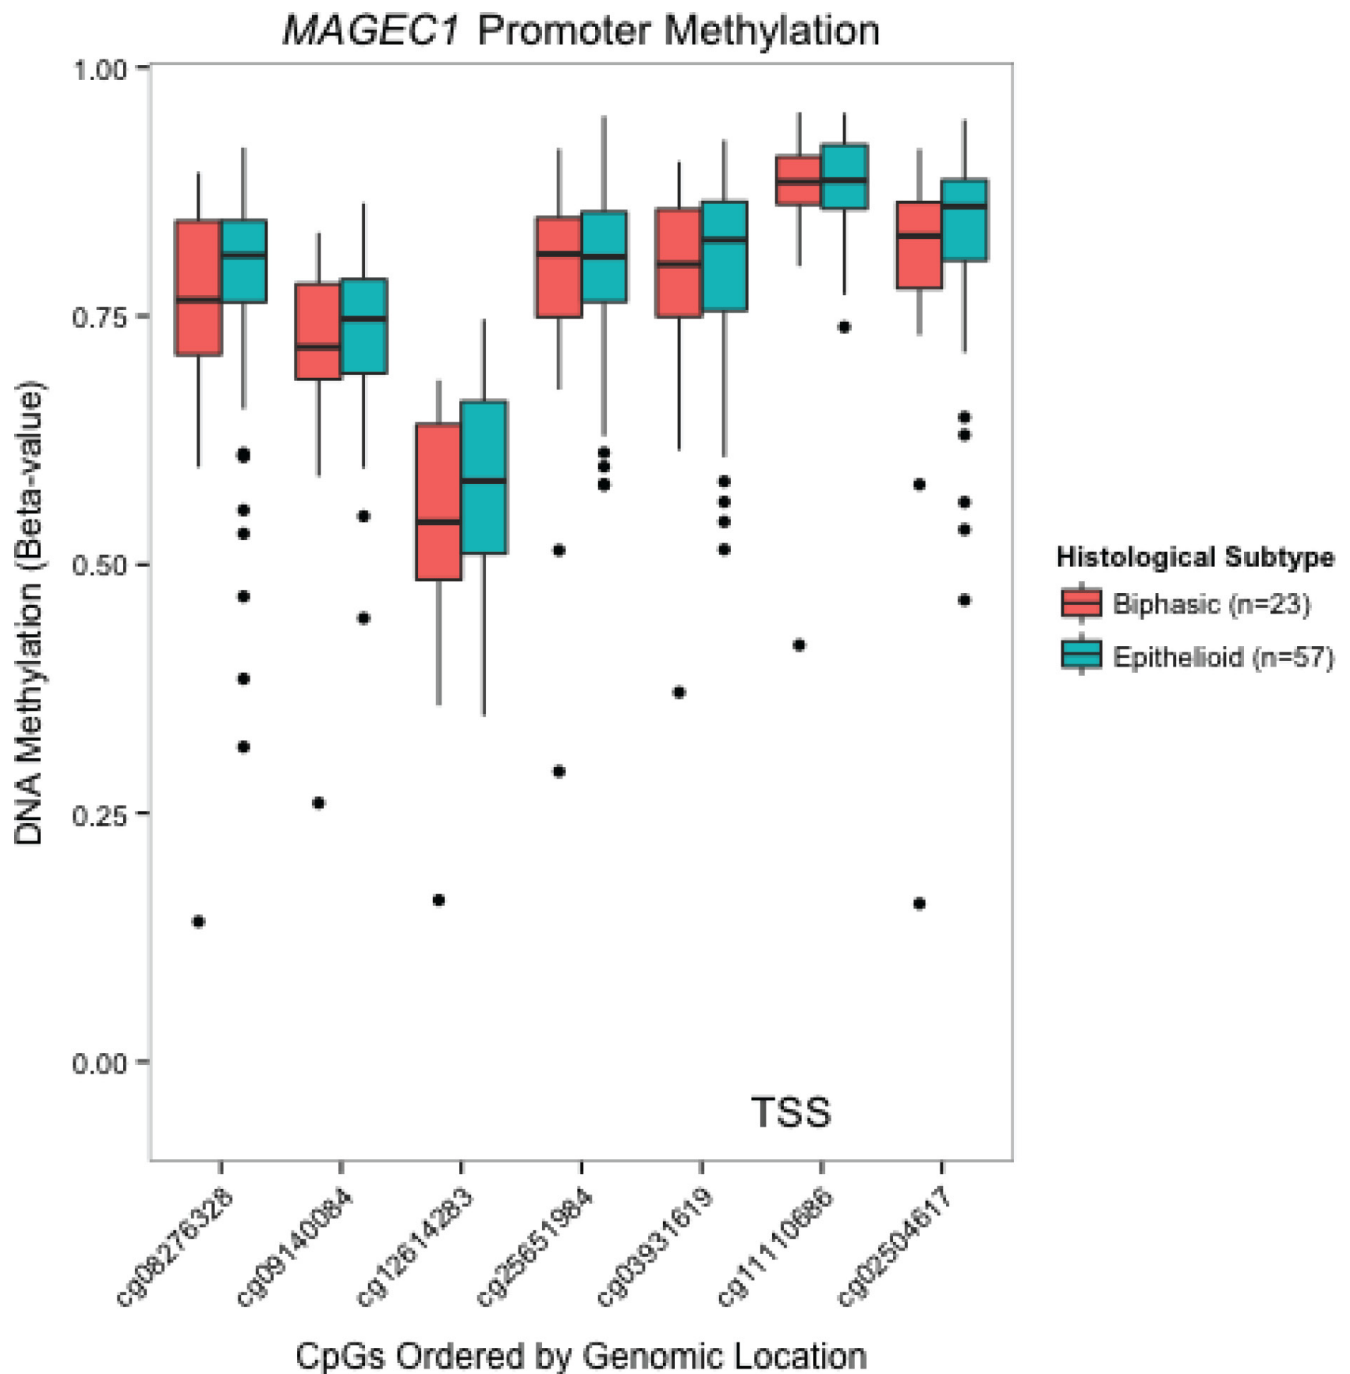

**Supplementary Figure S3: *MAGEC1* gene promoter is methylated in both epithelioid and biphasic mesothelioma.** CpG sites in the promoter region of *MAGEC1* from the Illumina HumanMethylation450 array are shown in 5' to 3' order versus methylation beta-value which represents the percent methylation of the sample. Mesotheliomas are stratified by tumor histology, epithelioid ( $n = 57$ ), and biphasic ( $n = 23$ ).

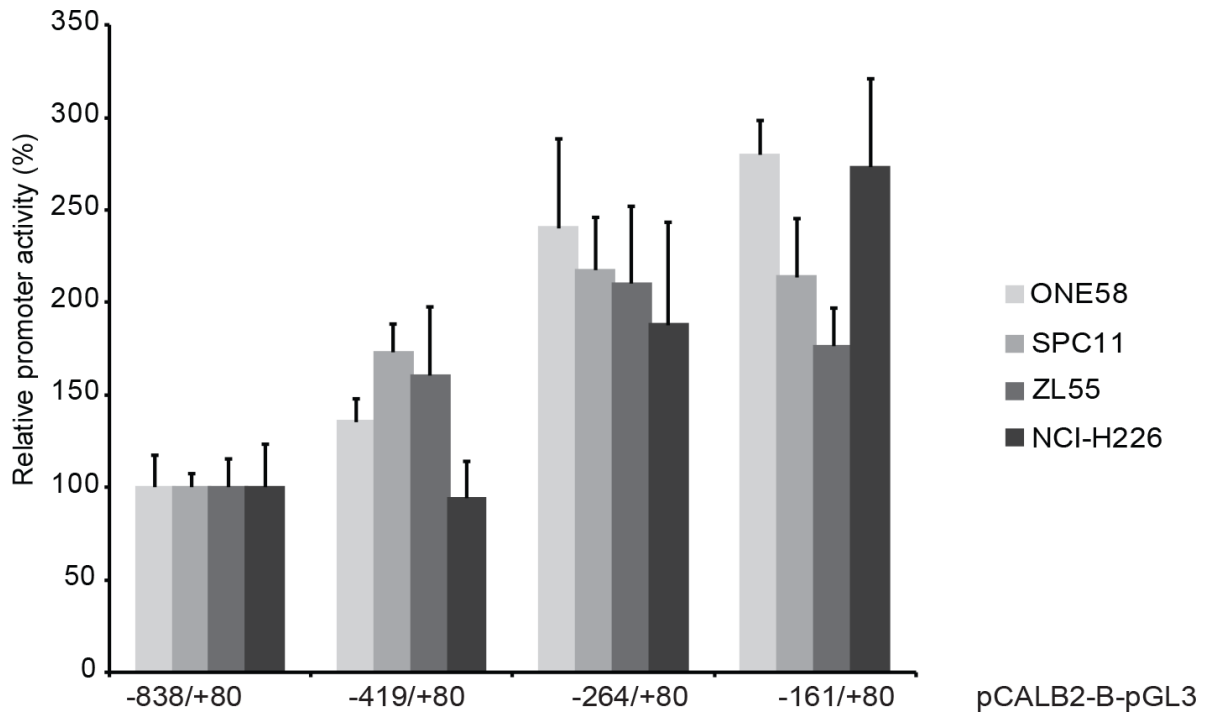

**Supplementary Figure S4: The -161/+80bp *CALB2* promoter region has the highest transcriptional activity.** Transcriptional activity of the indicated promoter constructs expressed relative to the longest *CALB2* promoter construct, -838/+ 80bp. The -161/+ 80bp region is the minimal promoter.

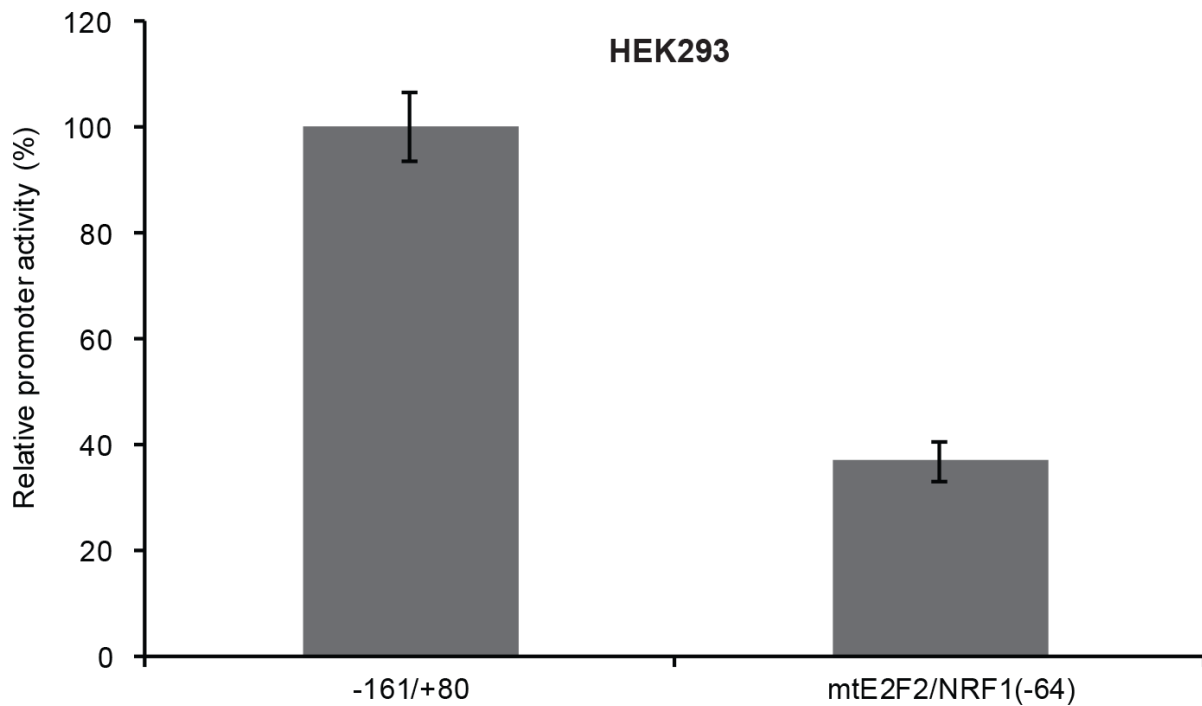

**Supplementary Figure S5: The -161/+80bp *CALB2* minimal promoter region is active in HEK293 cells and mutation in the E2F2/NRF-1 site strongly reduced its activity.** The wild-type reporter plasmid expression was arbitrarily set to 100% and the reporter activity of the mutants is expressed as a percentage of the wild-type construct. Mean  $\pm$  SD,  $n = 3$ .



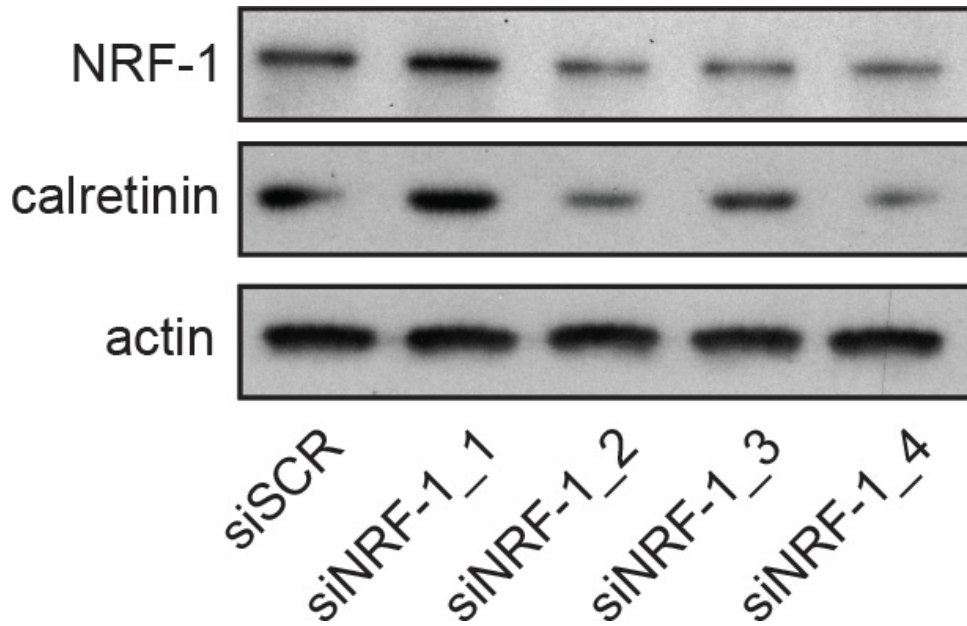

**Supplementary Figure S7:** Silencing of NRF-1 with siRNA decreases calretinin expression in SPC111 mesothelioma cells.

**Supplementary Table S1: Patient demographic and tumor characteristics for methylation analysis of *CALB2* promoter**

| Covariate        | <i>n</i> (%) |
|------------------|--------------|
| Age at diagnosis |              |
| Range (median)   | 28–81 (64)   |
| Mean (sd)        | 63 (9.8)     |
| Gender           |              |
| Male             | 71 (81.6)    |
| Female           | 16 (18.4)    |
| Race             |              |
| Caucasian        | 85 (97.7)    |
| Asian            | 1 (1.15)     |
| African American | 1 (1.15)     |
| Histology*       |              |
| Epithelioid      | 57 (65.5)    |
| Biphasic         | 23 (26.5)    |
| Sarcomatoid      | 2 (2.3)      |
| Diffuse NOS      | 5 (5.7)      |
| Stage            |              |
| I / II           | 26 (29.9)    |
| III / IV         | 61 (70.1)    |

\*Epithelioid and biphasic samples were included in data analysis, NOS: not otherwise specified.

**Supplementary Table 2: Correlation between *MAGEC1* gene promoter CpG methylation and *MAGEC1* expression (\*Spearman's test)**

| cgID       | Chromosome | Genomic Location | Epithelioid Correlation Coefficient | Epithelioid <i>P</i> -value* | Biphasic Correlation Coefficient | Biphasic <i>P</i> -value* |
|------------|------------|------------------|-------------------------------------|------------------------------|----------------------------------|---------------------------|
| cg08276328 | X          | 140990738        | -0.26                               | 0.05                         | 0.09                             | 0.67                      |
| cg09140084 | X          | 140990878        | -0.11                               | 0.4                          | 0.13                             | 0.55                      |
| cg12614283 | X          | 140991045        | -0.14                               | 0.28                         | 0.09                             | 0.68                      |
| cg25651984 | X          | 140991592        | -0.19                               | 0.15                         | 0.28                             | 0.2                       |
| cg03931619 | X          | 140991599        | -0.07                               | 0.6                          | 0.27                             | 0.21                      |
| cg11110686 | X          | 140991714        | -0.29                               | 0.03                         | 0                                | 0.99                      |
| cg02504617 | X          | 140992417        | -0.29                               | 0.03                         | 0.15                             | 0.5                       |

## REFERENCES

1. Lindholm PM, Salmenkivi K, Vauhkonen H, Nicholson AG, Anttila S, Kinnula VL, et al. Gene copy number analysis in malignant pleural mesothelioma using oligonucleotide array CGH. *Cytogenet Genome Res.* 2007; 119:46–52.
2. Christensen BC, Houseman EA, Poage GM, Godleski JJ, Bueno R, Sugarbaker DJ, et al. Integrated profiling reveals a global correlation between epigenetic and genetic alterations in mesothelioma. *Cancer Res.* 2010; 70:5686–94.
